# Supplementary material
Source: publisher figshare collection journal article supplement (https://sage.figshare.com/ndownloader/files/16860983)
Supplement: Supplementary file 1 [file 16860983]

Welcome to My Survey

## DEMOGRAPHIC INFORMATION

1. What is your gender?

☐ Female

☐ Male



2. What is your race?

*Please choose only one of the following:*

- ☐ Black
- ☐ White
- ☐ Coloured
- ☐ Indian

Other (please specify)

3. Highest degree attained

- ☐ PhD
- ☐ MMed
- ☐ MPhil
- ☐ MSoc Sci
- ☐ MSc
- ☐ MBChB
- ☐ Honours
- ☐ Bachelors

Other (please specify)

4. What is your institution of affiliation?

*Please choose all that apply:*

- ☐ University
- ☐ Research institution
- ☐ Hospital/Health facility
- ☐ Public Health
- ☐ Repository/Biobank
- ☐ Other academic institution

Other (please specify)



5. What is your most frequent work activity?

*Please choose only one of the following:*

- ☐ Research
- ☐ Clinical
- ☐ Academics/Lecturing
- ☐ Administration
- ☐ Not applicable

Other (please specify)

6. Have you ever participated in research involving the collection, storage and future use of human biological materials?

*Please choose only one of the following:*

- ☐ Yes
- ☐ No

7. What is/was your role in repository/biobank research?

*Please choose all that apply:*

- ☐ Principal investigator
- ☐ Co-Principal Investigator
- ☐ Researcher
- ☐ Clinician
- ☐ Pathologist
- ☐ Laboratory/Repository personnel
- ☐ Bioethicist/REC member

Other (please specify)



8. How long have you been involved in repository/biobank research?

*Please choose only one of the following:*

- ☐ Never been involved
- ☐ Less than 1 year
- ☐ 1-2 years
- ☐ 3-5 years
- ☐ 6-9 years
- ☐ More than 10 years

9. Have you ever served on a Research Ethics Committee?

*Please choose all that apply and provide a comment:*

- ☐ Yes
- ☐ No

10. If yes for how long?

## INFORMED CONSENT

**This section explores your perspectives on informed consent in human research that involves the collection, storage and future use of human biological specimens.**

***Please indicate your level of agreement with each statement on a scale from strongly agree to strongly disagree.***





11. Studies that involve the storage of human biological materials for future research require separate informed consent forms for the current study and another one for each new study using the stored sample.

*Please choose only one of the following:*

- ☐ Strongly Agree
- ☐ Somewhat Agree
- ☐ Neutral
- ☐ Somewhat Disagree
- ☐ Strongly Disagree
- ☐ Don't know

**The next set of questions is about broad consent and general consent.**

**In general consent, at the time of sample collection participants consent for the use of their samples in any and all future studies with no restrictions on the purpose of the research.**

**In broad consent, at the time of sample collection participants consent for the use of their samples in the current study and a wide range of future research studies based on a broad category and whose specifics are unknown.**



12. What is your opinion on the type of consent that is applicable to biobank-related research?

*Please choose the appropriate response for each item:*

|   | Strongly Agree |  |  | Neutral | Somewhat Agree |  | Somewhat Strongly Disagree |
|---|----------------|--|--|---------|----------------|--|----------------------------|
|   | disagree       |  |  |         |                |  |                            |
| T |                |  |  |         |                |  |                            |
| h |                |  |  |         |                |  |                            |
| e |                |  |  |         |                |  |                            |
| u |                |  |  |         |                |  |                            |
| s |                |  |  |         |                |  |                            |
| e |                |  |  |         |                |  |                            |
| o |                |  |  |         |                |  |                            |
| f |                |  |  |         |                |  |                            |
| a |                |  |  |         |                |  |                            |
| b |                |  |  |         |                |  |                            |
| r |                |  |  |         |                |  |                            |
| o |                |  |  |         |                |  |                            |
| a |                |  |  |         |                |  |                            |
| d |                |  |  |         |                |  |                            |
| c |                |  |  |         |                |  |                            |
| o |                |  |  |         |                |  |                            |
| n |                |  |  |         |                |  |                            |
| s |                |  |  |         |                |  |                            |
| e |                |  |  |         |                |  |                            |
| n |                |  |  |         |                |  |                            |
| t |                |  |  |         |                |  |                            |
| f |                |  |  |         |                |  |                            |
| o |                |  |  |         |                |  |                            |
| r |                |  |  |         |                |  |                            |
| r |                |  |  |         |                |  |                            |
| e |                |  |  |         |                |  |                            |
| s |                |  |  |         |                |  |                            |
| e |                |  |  |         |                |  |                            |
| a |                |  |  |         |                |  |                            |
| r |                |  |  |         |                |  |                            |
| c |                |  |  |         |                |  |                            |
| h |                |  |  |         |                |  |                            |
| t |                |  |  |         |                |  |                            |
| h |                |  |  |         |                |  |                            |
| a |                |  |  |         |                |  |                            |
| t |                |  |  |         |                |  |                            |
| a |                |  |  |         |                |  |                            |
| n |                |  |  |         |                |  |                            |
| t |                |  |  |         |                |  |                            |
| i |                |  |  |         |                |  |                            |
| c |                |  |  |         |                |  |                            |
| i |                |  |  |         |                |  |                            |

p  
a  
t  
e  
s  
f  
u  
t  
u  
r  
e  
(  
u  
n  
k  
n  
o  
w  
n  
)  
r  
e  
s  
e  
a  
r  
c  
h  
s  
t  
u  
d  
i  
e  
s  
i  
s  
a  
c  
c  
e  
p  
t  
a  
b  
l  
e  
.  
A  
ge

ner  
al  
co  
ns  
ent  
sh  
oul  
d  
onl  
y  
be  
ac  
ce  
pte  
d  
wh  
en  
sa  
mp  
les  
are  
an  
on  
ym  
ou  
s.

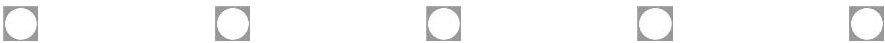

A  
res  
ea  
rch  
pa  
rtic  
ipa  
nt  
ha  
s  
the  
rig  
ht  
to  
est  
abl  
ish  
lim  
its  
re  
ga  
rdi

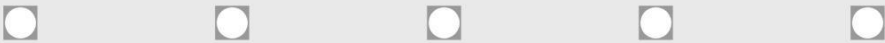

ng  
the  
res  
ea  
rch  
tha  
t  
ca  
n  
be  
do  
ne  
usi  
ng  
his  
or  
he  
r  
tis  
su  
e.

T  
h  
e  
li  
m  
it  
s  
s  
h  
o  
ul  
d  
a  
p  
pl  
y  
e  
v  
e  
n  
a  
ft  
e  
r  
t  
h  
e  
ti  
s  
s

u  
e  
s  
a  
m  
pl  
e  
h  
a  
s  
b  
e  
e  
n  
c  
o  
m  
pl  
e  
t  
el  
y  
m  
a  
d  
e  
a  
n  
o  
n  
y  
m  
o  
u  
s

☐

☐

☐

☐

☐

13. I believe it is ethically necessary to obtain re-consent from research participants if:

*Please choose the appropriate response for each item:*

Strongly Agree  
Disagree

Neutral  
Somewhat Agree  
Somewhat  
Strongly Disagree

Th  
e  
res  
ear  
ch  
er  
wa

☐

☐

☐

☐

☐



nts  
to  
inv  
est  
iga  
te  
a  
diff  
ere  
nt,  
but  
rel  
ate  
d,  
co  
ndi  
tio  
n  
or  
cli  
nic  
al  
ma  
nif  
est  
ati  
on.

Th  
e  
res  
ea  
rch  
er  
wa  
nts  
to  
inv  
est  
iga  
te  
an  
un  
rel  
ate  
d  
co  
ndi  
tio  
n  
or

clinical  
manifestation.

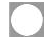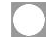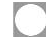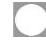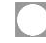

The research  
ch  
er  
wa  
nts  
to  
ad  
d  
ge  
net  
ic  
me  
as  
ure  
s  
to  
a  
stu  
dy  
tha  
t  
did  
not  
ori  
gin  
ally  
incl  
ud  
e  
the  
m.

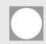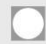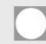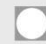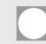

The  
re  
s  
ear  
ch  
er  
wa  
nts

to  
sh  
are  
the  
par  
tici  
pa  
nt'  
s  
de-  
ide  
ntif  
ied  
sa  
mp  
le  
or  
dat  
a  
(wi  
tho  
ut  
a  
lin  
ka  
ge  
file  
)  
wit  
h  
an  
inv  
est  
iga  
tor  
at  
an  
oth  
er  
ins  
titu  
tio  
n.

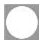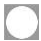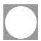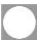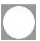



14. In case re-consent is not possible would REC approval for all new studies suffice?

*Please choose only one of the following:*

☐ Yes

☐ No

## INFORMED CONSENT

**The following questions address consent and assent from minors (< 18 years)**

15. Please indicate your level of agreement with each statement on a scale of “Strongly agree to Strongly disagree”.

*Please choose the appropriate response for each item:*

Strongly Agree

Disagree

Neutral      Somewhat Agree  
Somewhat  
Strongly Disagree

Pa  
ren  
tal  
co  
ns  
ent  
is  
suf  
fici  
ent  
for  
sto  
rag  
e  
of  
bio  
log  
ical  
sa  
mp  
les  
for  
ge  
net  
ic  
res

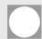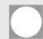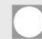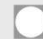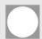

ear  
ch  
of  
an  
y  
chil  
d  
wh  
o  
ca  
nn  
ot  
as  
se  
nt  
(gi  
ve  
per  
mi  
ssi  
on)  
be  
ca  
us  
e  
he/  
sh  
e  
ca  
nn  
ot  
un  
der  
sta  
nd  
the  
nat  
ure  
of  
res  
ear  
ch.

Once a child can  
understand the  
implications of biological  
sample storage and  
genetic research, he/she  
must be allowed to  
assent (give  
permission).

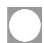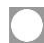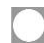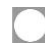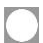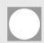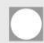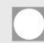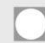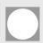

A  
chil  
d  
sh  
oul  
d  
ha  
ve  
the  
rig  
ht  
to  
wit  
hdr  
aw  
the  
ir  
bio  
sp  
eci  
me  
n/d  
ata  
fro  
m  
a  
rep  
osi  
tor  
y  
wh  
en  
he/  
sh  
e  
is  
18  
ye  
ars  
old  
.





16. From which age do you think children can understand the implications of storage of biological samples for future genetic research?

*Please choose only one of the following:*

- ☐ 0-3 years
- ☐ 4-6 years
- ☐ 7-9 years
- ☐ 10-12 years
- ☐ 13-15 years
- ☐ 16-18 years

17. From which age do you think children can understand the implications of genetic research?

*Please choose only one of the following:*

- ☐ 0-3 years
- ☐ 4-6 years
- ☐ 7-9 years
- ☐ 10-12 years
- ☐ 13-15 years
- ☐ 16-18 years

## HUMAN PARTICIPANT PROTECTION

**This part is about the protection of human participants in research involving the use of their biospecimens.**



18. For the following questions where the term “coded” is used, it refers to de-identified/anonymized specimens, samples, or data in which the original investigator maintains a linkage file (with study numbers and personal identifiers) separate from the specimens/samples/data. This linkage would not be available to other investigators.

*Please choose the appropriate response for each item:*

Strongly Agree

Neutral      Somewhat Agree  
Somewhat  
Strongly Disagree

Disagree

The storage of human biological specimens and



a  
t  
a  
f  
o  
r  
f  
u  
t  
u  
r  
e  
g  
e  
n  
e  
t  
i  
c  
r  
e  
s  
e  
a  
r  
c  
h  
i  
s  
a  
c  
c  
e  
p  
t  
a  
b  
l  
e  
a  
s  
l  
o  
n  
g  
a  
s  
t  
h  
e  
y

a  
r  
e  
a  
n  
o  
n  
y  
m  
i  
z  
e  
d  
.

A  
p  
a  
rt  
i  
c  
i  
p  
a  
n  
t  
w  
h  
o  
d  
o  
n  
a  
t  
e  
s  
b  
l  
o  
o  
d  
f  
o  
r  
s  
c  
i  
e  
n  
ti  
fi  
c

r  
e  
s  
e  
a  
r  
c  
h  
r  
e  
m  
a  
i  
n  
s  
i  
n  
c  
o  
n  
t  
r  
o  
l  
o  
v  
e  
r  
h  
i  
s  
/  
h  
e  
r  
b  
l  
o  
o  
d  
.

Us  
e  
of  
cod  
ed  
hu  
ma  
n  
tiss  
ue  
spe

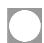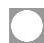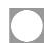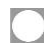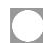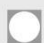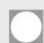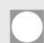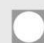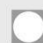

cim  
ens  
con  
stit  
ute  
s  
hu  
ma  
n  
sub  
ject  
res  
ear  
ch  
(As  
su  
me  
res  
ear  
che  
rs  
do  
not  
hav  
e  
acc  
ess  
to  
the  
link  
bet  
we  
en  
the  
ori  
gin  
al  
an  
d  
cod  
ed  
dat  
a).







w  
o  
u  
l  
d  
b  
e  
p  
e  
r  
s  
o  
n  
a  
l  
l  
y  
i  
d  
e  
n  
t  
i  
f  
i  
e  
d  
i  
n  
a  
s  
t  
u  
d  
y  
i  
n  
v  
o  
l  
v  
i  
n  
g  
c  
o  
d  
e  
d  
d  
a

t  
a  
?  
H  
o  
w  
li  
k  
e  
l  
y  
i  
s  
it  
t  
h  
a  
t  
a  
r  
e  
s  
e  
a  
r  
c  
h  
p  
a  
r  
ti  
c  
i  
p  
a  
n  
t  
w  
o  
u  
l  
d  
b  
e  
h  
a  
r  
m  
e  
d

a  
s  
a  
r  
e  
s  
u  
lt  
o  
f  
i  
d  
e  
n  
ti  
fi  
c  
a  
ti  
o  
n  
f  
r  
o  
m  
c  
o  
d  
e  
d  
d  
a  
t  
a  
?

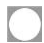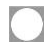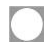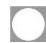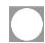

H  
o  
w  
lik  
el  
y  
is  
it  
th  
at  
a  
go  
ve  
rn  
m

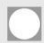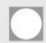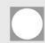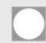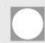

en  
t  
ag  
en  
cy  
or  
ot  
he  
r  
la  
w  
en  
for  
ce  
m  
en  
t  
t  
ag  
en  
cy  
mi  
gh  
t  
co  
m  
pe  
l  
in  
ve  
sti  
ga  
tor  
s  
to  
di  
sc  
lo  
se  
inf  
or  
m  
ati  
on  
ab  
ou  
t  
ge  
ne  
tic  
re  
se  
ar

ch  
pa  
rti  
ci  
pa  
nt  
s?

20. Improper handling of research results can cause harm to the community from which a sample donor belongs

*Please choose only one of the following:*

- ☐ Strongly Agree
- ☐ Somewhat Agree
- ☐ Neutral
- ☐ Somewhat Disagree
- ☐ Strongly Disagree
- ☐ Don't know

## REC REVIEW PROCESS

**This section addresses the ethics review process.**



21. Which of the following issues (if any) have required considerable discussion between researchers and REC in the review of research involving the future use of biospecimens e.g genetic research? By 'considerable discussion' we mean more than 2 or 3 back-and-forth rounds and/or more than a 1-hour conversation

*Please choose all that apply:*

- ☐ Procedures for protecting personal information and samples
- ☐ Informed consent process and documentation
- ☐ Re-consent for use of sample/ data for a new study or change in purpose
- ☐ Independent ethical review of all new studies on stored samples
- ☐ Plans or lack of plans to deal with community harm or benefits
- ☐ None of the above
- ☐ Other (please specify)

22. Which of the following issues (if any) have required considerable discussion between researchers and REC in the review of research involving the future use of biospecimens e.g genetic research? By 'considerable discussion' we mean more than 2 or 3 back-and-forth rounds and/or more than a 1-hour conversation

*Please choose all that apply:*

- ☐ Procedures for protecting personal information and samples
- ☐ Informed consent process and documentation
- ☐ Re-consent for use of sample/ data for a new study or change in purpose
- ☐ Independent ethical review of all new studies on stored samples
- ☐ Plans or lack of plans to deal with community harm or benefits
- ☐ None of the above

## CHALLENGES IN ETHICS REVIEW

**We would appreciate it if you answered the following two questions**





23. Have you ever had any challenges in the ethical review of research involving the use of HBM?

*Please choose only one of the following:*

☐ Yes

☐ No

24. If yes what challenges did you face? Suggests ways in which such challenges can be overcome?

*Please write your answer here:*

25. What is your opinion on the export and sharing of biological specimens and associated data e.g in genetic research?

Please write your answer here:

26. Thank you for participating in this study, if you choose, please feel free to offer any comments you would like to share with us
